# Supplementary material
Source: PubMed Central journal article supplement (PMC2897158)
Supplement: NIHMS207184-supplement-01.pdf [file NIHMS207184-supplement-01.pdf]

Supplemental Information Inventory

**Figure S1**, related to Figure 1. Effect of 5 separate ErbB3 shRNAs on OVCAR8 cell proliferation.

**Figure S2**, related to Figure 2. EGFR and Her-2 status in ovarian cancer cell lines

**Figure S3**, related to Figure 3. Effect of NRG1 depletion on ovarian cancer cell lines

**Figure S4**, related to Figure 5.

**Table S1**, related to Figure 1. Complete tyrosine kinase shRNA library screening results.

**Table S2**, related to Figure 2. NRG1/ErbB3 status and shErbB3 sensitivity in ovarian cancer cell lines.

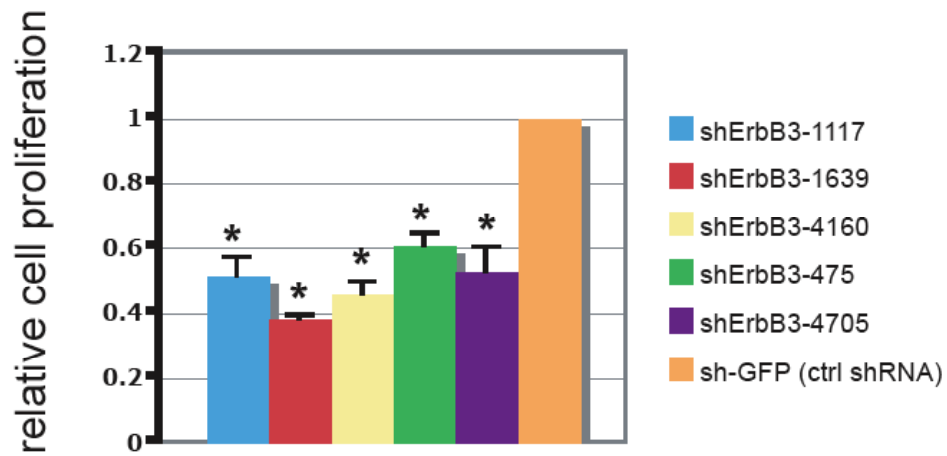

**Figure S1. Effect of 5 separate ErbB3 shRNAs on OVCAR8 cell proliferation.** (Related to Figure 1.) Depletion of ErbB3 by 5 separate shRNAs resulted in decreased OVCAR8 cell proliferation as assessed by CellTiter-Glo assay. Error bar represents +/- SD.

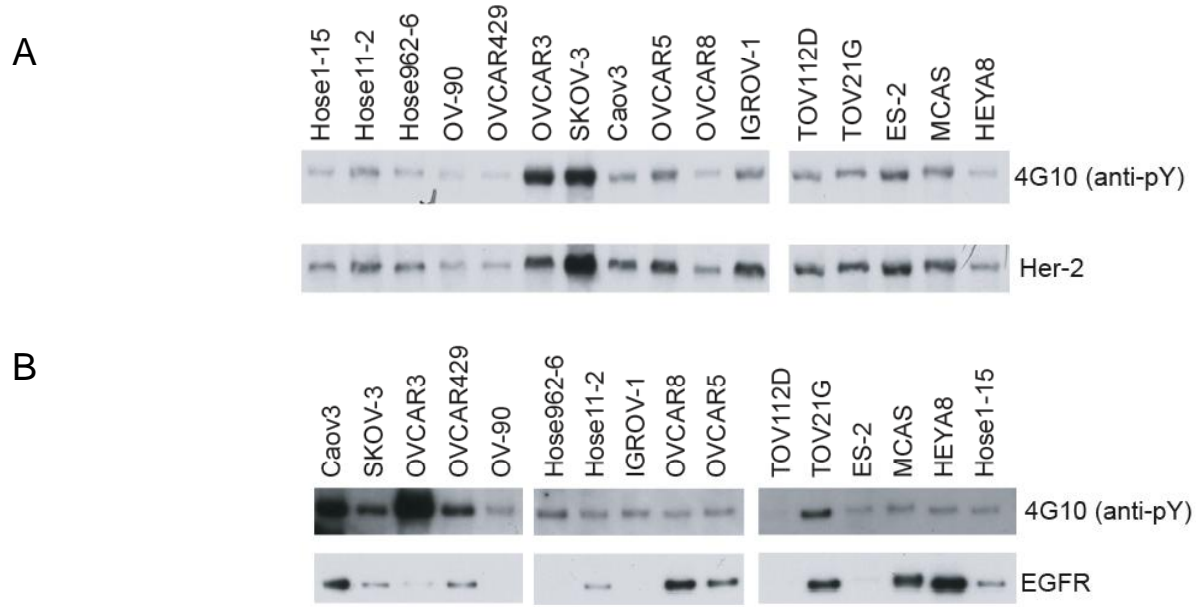

**Figure S2. EGFR and Her-2 status in ovarian cancer cell lines. (Related to Figure 2.)** Cell lysates from 16 ovarian cancer cell lines were immunoprecipitated with either anti-Her-2 (A) or anti-EGFR (B) antibody followed by blotting with either anti-phosphotyrosine antibody 4G10 (top panels) or anti-Her-2 antibody (A, bottom panel) or anti-EGFR antibody (B, bottom panel).

A

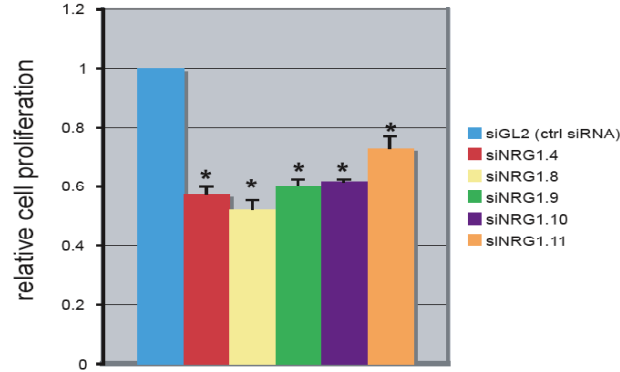

B

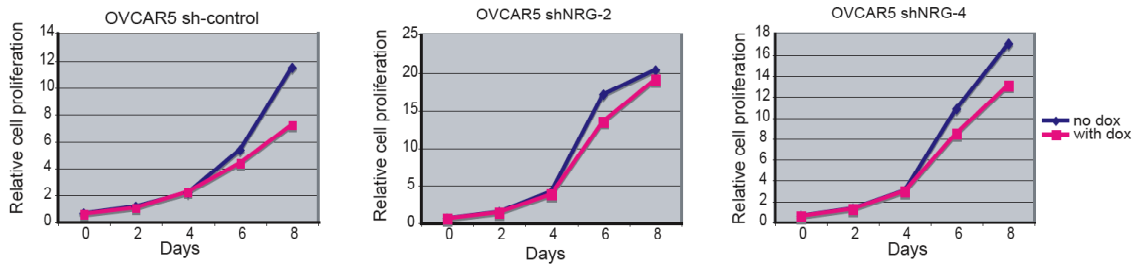

C

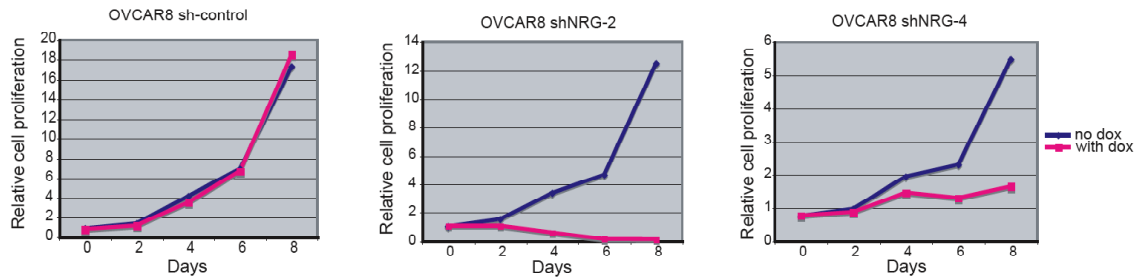

D

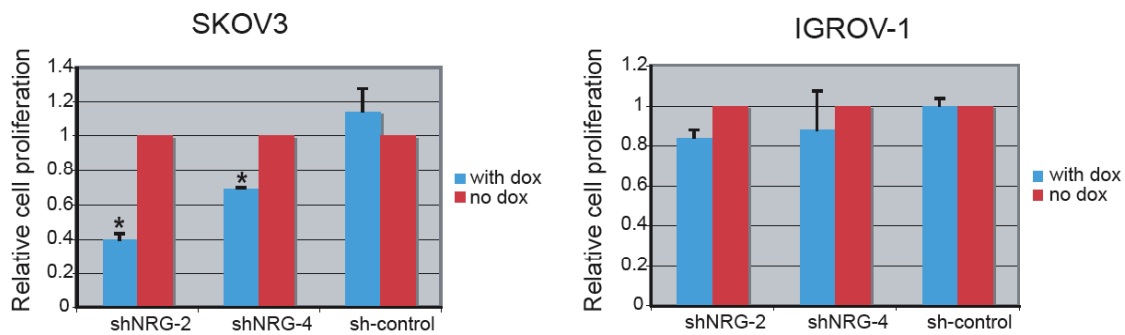

**Figure S3. Effect of depletion of NRG1 expression on different ovarian cancer cell lines. (Related to Figure 3.)** A) Depletion of NRG1 by 5 separate siRNAs resulted in decreased OVCAR8 cell proliferation as assessed by CellTiter-Glo assay. \*: values are significantly different from control shRNA or siRNA ( $p < 0.05$  student's t-test). B) OVCAR5 is insensitive but C) OVCAR8 is sensitive to NRG1 depletion. D) SKOV3 but not IGROV-1 is sensitive to NRG1 depletion. \*:  $p < 0.05$  (student's t-test). Error bars represent  $\pm$  SD.

A

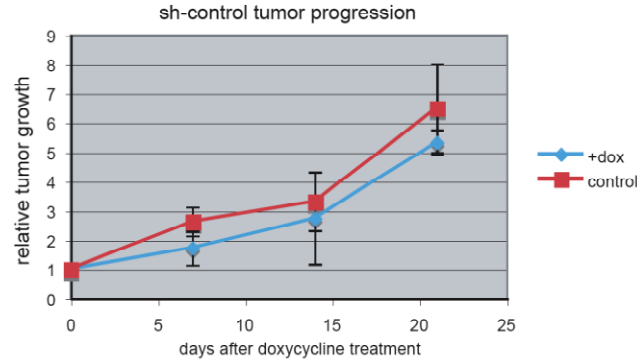

B

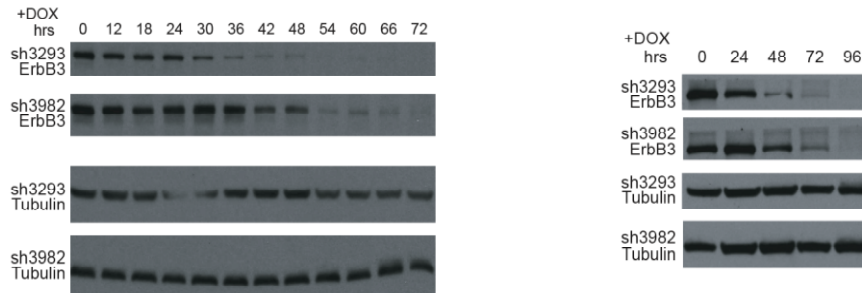

C

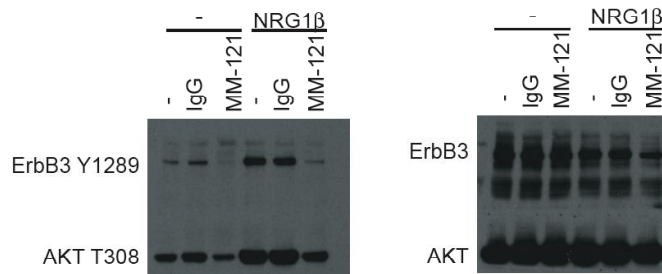

**Figure S4. (Related to Figure 5.)** A) Growth of intraperitoneally implanted luciferized OVCAR8 cells containing a doxycycline inducible control (scrambled) shRNA in the presence or absence of doxycycline. Tumor growth was monitored by bioluminescence. Error bars represent  $\pm$  SEM. B) shErbB3-3293 induces depletion of endogenous ErbB3 earlier than shErbB3-3982 in either 3D spheroid culture or in mouse xenografts. Left panel, ErbB3 protein level from OVCAR8 cells carrying either tet-inducible shErbB3-3293 or shErbB3-3982 in 3D spheroid culture at different time points after addition of doxycycline. Right panel, ErbB3 protein level from OVCAR8 cells carrying either tet-inducible shErbB3-3293 or shErbB3-3982 growing subcutaneously in nude mice at different time points after mice were fed with doxycycline-containing water. In both panels, tubulin served as a protein loading control. C) MM-121 effect on ErbB3 status in OVCAR8 cells. Left panel, MM-121 reduces endogenous as well as NRG1 $\beta$  stimulated ErbB3 phosphorylation. Right panel, MM-121 effect on ErbB3 protein level. Irrelevant human IgG served as a control for MM-121 in these experiments.

**Table S2. NRG1/ErbB3 status and sensitivity to shErbB3 in ovarian cancer cell lines. (Related to Figure 2.)**

| Cell Line | NRG cDNA | ErbB3 | Y1289P ErbB3 | Sensitivity to shErbB3 |
|-----------|----------|-------|--------------|------------------------|
| OVCAR8    | +++      | +++   | +++          | Yes                    |
| OVCAR5    | -        | +++   | -            | No                     |
| OVCAR3    | ++       | +++   | ++           | NT                     |
| HEYA8     | +        | -     | -            | No                     |
| OVCA429   | +        | +++   | +            | NT                     |
| OVCA420   | -        | +++   | +++          | Puro-resistant*        |
| TOV112D   | ++       | +     | +            | No                     |
| IGROV-1   | -        | ++    | -            | No                     |
| CaOV3     | +        | +++   | -            | NT                     |
| FuOV1     | ++       | +++   | -            | NT                     |
| OV90      | +++      | ++    | -            | NT                     |
| OVCAR432  | +        | +++   | -/+          | No                     |
| OVCAR433  | ++       | +++   | +++          | No                     |
| ES-2      | -        | +++   | +++          | NT                     |
| SKOV3     | +++      | +     | +++          | Yes                    |
| TOV21G    | ++       | ++    | +++          | No                     |

NT = not tested

\* Could not be infected with shErbB3 as these cells are intrinsically resistant to puromycin.
